# Supplementary material
Source: Research Square preprint supplement (doi:10.21203/rs.3.rs-9250803/v1)
Supplement: Supplementary file 1 [file 0045142e560be9dffc418fe3.docx]

**Supplementary Material S1.** Description of the POCUS learning activity and instructional design

**S1-1. Learning activity overview**

The structured point-of-care ultrasound (POCUS) learning activity was conducted on Friday, 9 January 2026, from 13:00 to 17:00, as part of the clinical skills curriculum for undergraduate international medical students (Years 3–4). A total of 28 students participated in this in-person, faculty-led, hands-on session.

The learning activity took place at the Smart Healthcare Teaching Center on the sixth floor of the College of Medicine campus at I-Shou University, Taiwan. This facility is designed to support technology-enhanced clinical education, equipped with portable ultrasound systems and standardised scanning stations to facilitate experiential learning.

Clinical instruction was delivered by two external expert physicians from the Department of Emergency Medicine at National Cheng Kung University Hospital (NCKUH), both experienced in bedside ultrasound practice and teaching. Academic coordination and institutional oversight were provided by a deputy director from the School of Medicine for International Students at I-Shou University, ensuring alignment with the needs of a diverse, cross-cultural learner cohort. Two professional assistants provided on-site logistical support, including equipment preparation, learner rotation, and station management.

Students were divided into two groups (n = 14 per group), each supervised by one clinical instructor during hands-on scanning. A mid-session rotation ensured that all participants engaged with both instructors and experienced different instructional approaches. The pedagogical design positioned ultrasound as an extension of the physical examination, emphasising the integration of image acquisition and interpretation with bedside clinical reasoning through supervised deliberate practice and real-time feedback.

**S1-2. Learning objectives**

By the end of the learning activity, students were expected to be able to:

1. Explain core ultrasound principles relevant to bedside scanning, including probe selection, orientation, depth, gain, and common artefacts.
2. Demonstrate basic psychomotor competence in probe handling, ergonomics, and standard scanning techniques.
3. Acquire interpretable images for focused cardiac and abdominal ultrasound examinations using standardised protocols.
4. Identify key anatomical structures and selected clinically significant (“red-flag”) findings.
5. Integrate ultrasound findings into bedside clinical reasoning, linking imaging with differential diagnosis and immediate clinical decision-making.
6. Reflect on the limitations of point-of-care ultrasound, including operator dependence, contextual uncertainty, and the need for continued supervised practice.

These objectives were designed to align technical skill development with clinical reasoning and reflective learning, and informed the design of instructional activities, hands-on stations, and post-session reflective prompts.

**S1-3. Curriculum structure and instructional flow**

| **Time** | **Activity** | **Educational focus** | **Faculty role** |
| --- | --- | --- | --- |
| 13:00–13:15 | Orientation and safety briefing | Learning objectives, scope of practice, professionalism | Session lead (XX University) |
| 13:15–13:35 | Core concepts mini-lecture | Ultrasound fundamentals and clinical integration | Clinical instructors (NCKUH) |
| 13:35–13:55 | Faculty demonstration | Live scanning with think-aloud clinical reasoning | Emergency physicians (NCKUH) |
| 13:55–15:25 | Hands-on scanning – Round 1 | Supervised deliberate practice (cardiac/abdominal) | Instructor A / Instructor B |
| 15:25–15:35 | Break and group rotation | Rotation across instructional approaches | Session support staff |
| 15:35–16:55 | Hands-on scanning – Round 2 | Continued practice and reasoning integration | Instructor B / Instructor A |
| 16:55–17:00 | Wrap-up and instructions | Reflection and consolidation | Session lead (XX University) |

**S1-4. Faculty roles and responsibilities**

Clinical instructors (two external emergency physicians, National Cheng Kung University Hospital)

Delivered bedside ultrasound instruction and supervised hands-on scanning; provided real-time feedback on image acquisition and optimisation; facilitated integration of ultrasound findings into clinical reasoning processes; and contextualised learning using authentic emergency medicine scenarios.

Session lead (Deputy Director, I-Shou University)

Provided academic oversight and coordinated the design and implementation of the learning activity; ensured alignment between learning objectives, instructional strategies, and reflective components; and facilitated session orientation and closure.

Session support staff (two professional assistants, I-Shou University)

Managed on-site logistics including equipment setup and probe hygiene; supported learner grouping, time management, and rotation between stations; and ensured smooth operational flow.

**S1-5. Standardisation and quality assurance**

To ensure instructional consistency and educational quality, the learning activity employed standardised learning objectives, instructional materials, and scanning protocols across all participant groups. A consistent faculty-to-learner ratio (1:14) was maintained, and both clinical instructors were drawn from the same department (Emergency Medicine, NCKUH) to minimise variability.

The use of a dedicated technology-enhanced learning environment, together with structured instructional design and coordinated logistical support, ensured comparable learning conditions for all participants. These measures supported the reliability of the clinical reasoning-focused, technology-enhanced educational intervention implemented in this study.
