# Supplementary material
Source: Research Square preprint supplement (doi:10.21203/rs.3.rs-9250803/v1)
Supplement: Supplementary file 2 [file b4ef69f9ef118f989c659d4a.docx]

**Supplementary Material S2.** Reflection prompts for student participants

**S2-1. Purpose and timing of reflective data collection**

Reflective narratives were used as the primary data source to capture students’ subjective learning experiences, interpretive processes, and perceived professional development following participation in the structured point-of-care ultrasound (POCUS) learning activity. Reflection was employed to complement the skills-based nature of the activity, enabling learners to articulate how technology-enhanced instruction, hands-on practice, and feedback were internalised and translated into clinical understanding and clinical reasoning.

Students were invited to submit a written reflection one week after completion of the learning activity. This interval was designed to support reflection, cognitive consolidation, and integration of learning. Participation was voluntary, and students were informed that their reflections would be used solely for research purposes and would not affect academic assessment or standing.

Reflections were submitted electronically via the institutional learning platform. All submissions were anonymised prior to analysis by removing identifying details to ensure confidentiality.

**S2-2. Structure and guidance for reflective narratives**

Students were asked to submit a free-text reflective narrative of approximately 500–1,000 words. Rather than responding to rigid questions, participants were encouraged to reflect holistically on their learning experiences and to illustrate their reflections with concrete examples.

Guiding domains were provided to scaffold reflection while maintaining flexibility. Students could address these domains in any order and emphasise aspects they found most meaningful. This approach was intended to support authentic, learner-centred reflection and to capture diverse interpretations across a cross-cultural learner cohort.

**S2-3. Reflection domains and guiding prompts**

Students were invited to reflect on the following domains:

1. **Overall learning experience**

Describe your overall experience of the POCUS learning activity, including expectations, emotional responses, and meaningful aspects of the session.

1. **Hands-on learning and skill development**

Reflect on your experience with ultrasound scanning, including probe handling, image acquisition, and learning through supervised practice.

1. **Technical and cognitive challenges**

Identify challenges encountered during scanning or interpretation and describe how you addressed them.

1. **Feedback, supervision, and peer learning**

Reflect on how instructor feedback, supervision, and peer interaction influenced your learning.

1. **Clinical reasoning and diagnostic thinking**

Consider how the learning activity influenced your understanding of bedside assessment, diagnostic reasoning, and clinical decision-making.

1. **Perceived clinical value of POCUS**

Reflect on the role of POCUS in clinical practice and identify scenarios where it may support patient care.

1. **Limitations and responsible use**

Reflect on the limitations of POCUS (e.g., operator dependence, contextual uncertainty) and their implications for clinical use.

1. **Professional identity and preparedness**

Reflect on how this experience influenced your development as a future clinician, including confidence and preparedness.

1. **Contextual transfer and future application**

Consider how you might apply POCUS in future clinical settings, particularly in diverse or resource-variable healthcare contexts.

1. **Future learning needs**

Identify areas requiring further practice, supervision, or development to achieve sustained competence.

**S2-4. Alignment with instructional objectives**

The reflection domains were aligned with the learning objectives and instructional design of the POCUS learning activity (Supplementary Material S1). This alignment ensured coherence between experiential learning, reflective processes, and educational outcomes.

It also enabled exploration of how students integrated technical skill development, clinical reasoning, and emerging professional identity within a technology-enhanced and cross-cultural learning environment.
